# Supplementary material
Source: PubMed Central journal article supplement (PMC3019614)

A)

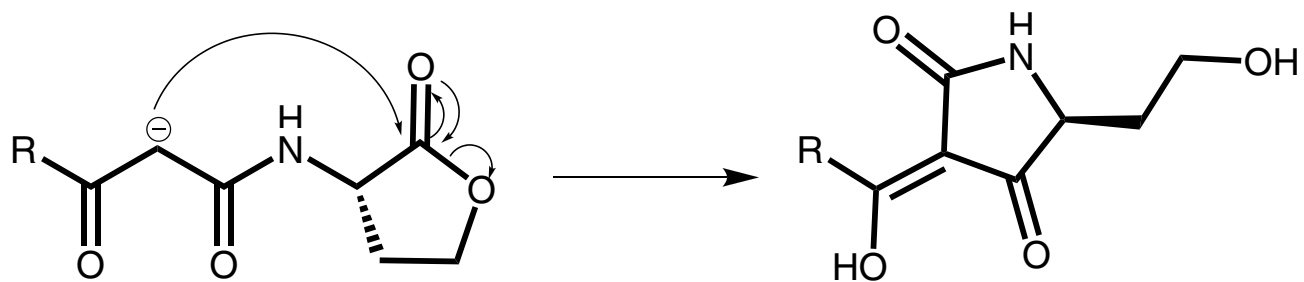

B)

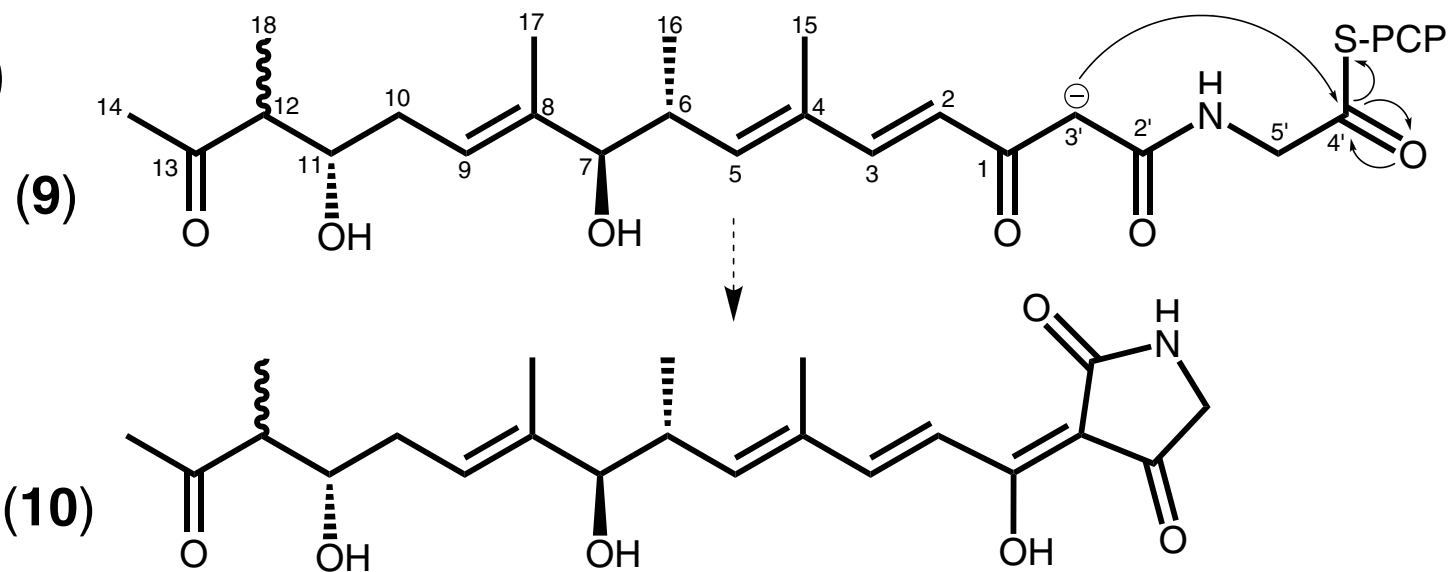

Supplement: NIHMS193226-supplement-Supp_Fig_s1.pdf [file NIHMS193226-supplement-Supp_Fig_s1.pdf]

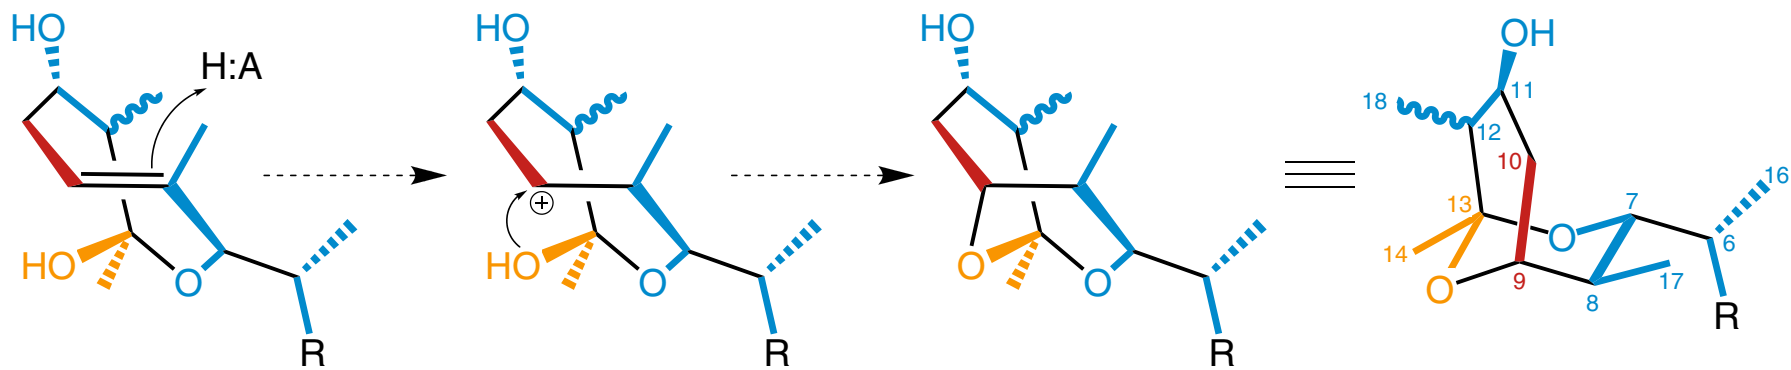

Supplement: NIHMS193226-supplement-Supp_Fig_s2.pdf [file NIHMS193226-supplement-Supp_Fig_s2.pdf]
